# Supplementary material for: Molecular Mapping to Discover Reliable Salinity-Resilient QTLs from the Novel Landrace Akundi in Two Bi-Parental Populations Using SNP-Based Genome-Wide Analysis in Rice
Source: MDPI journal article supplement (doi:10.3390/ijms241311141), 2023-07-06
Supplement: s1 [file s1]

**Supplementary Table S3.** Epistatic gene interaction for the traits related to seedling stage salinity tolerance in a F<sub>2:3</sub> population derived from the cross BR 28/ Akundi

| Trait        | Chr.1 | Position1<br>(cM) | FM1       | Chr.<br>2 | Position2<br>(cM) | LOD | FM2       | PVE<br>(%) | Add1   | Add2   | Addby<br>Add | TI                         |
|--------------|-------|-------------------|-----------|-----------|-------------------|-----|-----------|------------|--------|--------|--------------|----------------------------|
| SES          | 3     | 96.9              | M262-M265 | 4         | 70.7              | 10  | M340-M341 | 1.251      | 0.112  | -0.072 | -0.092       | Between complementary loci |
|              | 1     | 50.8              | M34-M35   | 5         | 60.2              | 19  | M419-M420 | 0.037      | 0.013  | -0.013 | -0.013       | Between complementary loci |
|              | 3     | 61.9              | M247-M248 | 6         | 26                | 23  | M482-M483 | 0.659      | -0.015 | 0.042  | -0.521       | Between complementary loci |
|              | 6     | 21                | M478-M479 | 6         | 91                | 13  | M511-M512 | 1.266      | -0.101 | -0.273 | -0.803       | Between complementary loci |
|              | 1     | 20.8              | M17-M18   | 6         | 101               | 10  | M514-M515 | 1.239      | 0.382  | -0.485 | 0.601        | Between complementary loci |
|              | 4     | 100.7             | M357-M359 | 6         | 101               | 11  | M514-M515 | 1.246      | -0.372 | -0.469 | -0.616       | Between complementary loci |
|              | 9     | 85.6              | M732-M733 | 11        | 21                | 10  | M793-M794 | 1.240      | 0.190  | 0.056  | 0.452        | Between complementary loci |
| Survival     | 6     | 26                | M482-M483 | 11        | 31                | 9   | M798-M799 | 1.260      | 0.980  | -0.131 | -0.132       | Between complementary loci |
|              | 5     | 50.2              | M414-M415 | 5         | 110.2             | 8   | M445-M446 | 0.778      | 0.529  | 0.194  | -9.727       | Between complementary loci |
|              | 5     | 50.2              | M414-M415 | 9         | 10.6              | 6   | M684-M685 | 0.737      | -6.791 | 2.075  | 3.111        | Between complementary loci |
|              | 6     | 26                | M482-M483 | 12        | 36.4              | 69  | M892-M893 | 1.320      | 1.507  | -1.552 | -2.671       | Between complementary loci |
| Shoot length | 3     | 31.9              | M226-M227 | 12        | 76.4              | 51  | M921-M922 | 1.527      | 4.915  | 1.564  | 1.599        | Between complementary loci |
|              | 4     | 75.7              | M343-M344 | 12        | 76.4              | 50  | M921-M922 | 1.703      | 5.586  | 1.661  | 1.665        | Between complementary loci |
|              | 10    | 40.6              | M755-M756 | 12        | 76.4              | 51  | M921-M922 | 1.544      | -4.533 | 1.545  | -1.590       | Between complementary loci |
|              | 11    | 1                 | M787-M788 | 12        | 81.4              | 26  | M924-M925 | 0.368      | -0.645 | 0.171  | -1.145       | Between complementary loci |

| Trait                    | Chr.1 | Position1<br>(cM) | FM1           | Chr.<br>2 | Position2<br>(cM) | LOD | FM2       | PVE<br>(%) | Add1   | Add2   | Addby<br>Add | TI                          |
|--------------------------|-------|-------------------|---------------|-----------|-------------------|-----|-----------|------------|--------|--------|--------------|-----------------------------|
| Shoot<br>dry<br>weight   | 6     | 86                | M510-<br>M511 | 10        | 50.6              | 34  | M764-M765 | 1.331      | -0.001 | 0.002  | 0.002        | Between QTLs and background |
| Root<br>length           | 10    | 50.6              | M764-<br>M765 | 12        | 36.4              | 15  | M892-M893 | 0.058      | -0.298 | -0.320 | 0.294        | Between complementary loci  |
|                          | 1     | 125.8             | M75-M76       | 2         | 90.4              | 15  | M165-M166 | 0.806      | 0.194  | 0.080  | 0.097        | Between complementary loci  |
|                          | 2     | 90.4              | M165-<br>M166 | 4         | 50.7              | 25  | M329-M330 | 0.515      | -0.023 | -2.527 | 0.023        | Between complementary loci  |
| SPAD                     | 2     | 90.4              | M165-<br>M166 | 6         | 121               | 32  | M531-M532 | 0.924      | -0.066 | 0.599  | 0.311        | Between complementary loci  |
|                          | 2     | 90.4              | M165-<br>M166 | 9         | 30.6              | 22  | M701-M702 | 0.248      | 2.018  | -1.477 | 2.388        | Between complementary loci  |
|                          | 2     | 90.4              | M165-<br>M166 | 10        | 60.6              | 15  | M769-M770 | 0.623      | -0.221 | -2.972 | 0.197        | Between complementary loci  |
| Na <sup>+</sup><br>Conc. | 2     | 110.4             | M180-<br>M181 | 7         | 97                | 11  | M579-M580 | 1.012      | 0.004  | 0.017  | -0.018       | Between QTLs and background |
| K <sup>+</sup><br>Conc.  | 3     | 51.9              | M240-<br>M241 | 12        | 76.4              | 24  | M921-M922 | 0.494      | -0.073 | -0.007 | 0.007        | Between complementary loci  |
|                          | 4     | 10.7              | M305-<br>M306 | 4         | 110.7             | 11  | M363-M364 | 0.848      | -0.067 | 0.085  | -0.015       | Between complementary loci  |
|                          | 3     | 61.9              | M247-<br>M248 | 12        | 76.4              | 49  | M921-M922 | 0.501      | 0.035  | -0.029 | 0.029        | Between complementary loci  |
| NaK<br>Ratio             | 4     | 75.7              | M343-<br>M344 | 12        | 76.4              | 39  | M921-M922 | 0.984      | -0.153 | -0.035 | -0.035       | Between complementary loci  |
|                          | 9     | 35.6              | M703-<br>M704 | 12        | 76.4              | 42  | M921-M922 | 1.114      | 0.154  | -0.034 | 0.035        | Between complementary loci  |

Chr. 1: Chromosome ID1; \*\*FM1: Flanking markers (Position1); \*\*\*Chr. 2: Chromosome ID2;<sup>1</sup> FM2: Flanking markers (Position2);<sup>2</sup> LOD:

LOD score due to epistatic effects;<sup>3</sup> PVE (%): PVE due to epistatic effects (%); Add1: Estimated additive effect of position1; Add2: Estimated

additive effect of position 2; Add1 by Add2: Additive by additive epistatic at the two interacting positions; TI: Types of interaction
