# Supplementary material for: Molecular Mapping to Discover Reliable Salinity-Resilient QTLs from the Novel Landrace Akundi in Two Bi-Parental Populations Using SNP-Based Genome-Wide Analysis in Rice
Source: MDPI journal article supplement (doi:10.3390/ijms241311141), 2023-07-06
Supplement: s1 [file s1]

**Supplementary Table S2.** Putative candidate genes in the QTL regions showing probable functions and references

| Characters        | QTL name      | Chr. | Position (bp)     | Number of locus | Candidate gene        | Possible function                                                                                                                                                                                                                                                                                                                                                       | Reference                                                    |
|-------------------|---------------|------|-------------------|-----------------|-----------------------|-------------------------------------------------------------------------------------------------------------------------------------------------------------------------------------------------------------------------------------------------------------------------------------------------------------------------------------------------------------------------|--------------------------------------------------------------|
| SES               | <i>qSES1</i>  | 1    | 38723347-38724165 | 16              | <i>LOC_Os01g66670</i> | expressed protein (drought-induced proteins, anther and pollen wall remodelling/metabolism proteins contribute to the tolerance of rice to salt stress)                                                                                                                                                                                                                 | Ke <i>et al.</i> (2009)<br>Sarhadi <i>et al.</i> (2012)      |
| Survival rate (%) | <i>qSUR11</i> | 11   | 5357710-5359379   | 15              | <i>LOC_Os11g09990</i> | mTERF family protein, expressed (coordinate mitochondrial transcription, growth, development and stress response)                                                                                                                                                                                                                                                       | Roberti <i>et. al.</i> (2010)<br>Zhao <i>et al.</i> (2014)   |
| Shoot length      | <i>qSL1</i>   | 1    | 39794226-39799341 | 18              | <i>LOC_Os01g68490</i> | tetratricopeptide-like helical, putative, expressed (abscisic acid responses and osmotic stress tolerance, enable plants to cope up with adverse environmental conditions )                                                                                                                                                                                             | Schapiro <i>et al.</i> (2008)<br>Sharma <i>et al.</i> (2016) |
|                   | <i>qSL8</i>   | 8    | 5613578-5616235   | 20              | <i>LOC_Os08g09715</i> | F-box domain containing protein, expressed (F-box protein-encoding genes during floral transition as well as panicle and seed development, play a variety of roles in developmental processes including plant hormonal signal transduction, floral development, secondary metabolism, senescence, circadian rhythms, and responses to both biotic and abiotic stresses) | Jain <i>et al.</i> (2007)<br>Zhang <i>et al.</i> (2019)      |

| Characters            | QTL name      | Chr. | Position (bp)     | Number of locus | Candidate gene        | Possible function                                                                                                                                                                          | Reference                                                                                 |
|-----------------------|---------------|------|-------------------|-----------------|-----------------------|--------------------------------------------------------------------------------------------------------------------------------------------------------------------------------------------|-------------------------------------------------------------------------------------------|
| Shoot dry weight      | <i>qSDW1</i>  | 1    | 31473897-31477599 | 17              | <i>LOC_Os01g54700</i> | retrotransposon protein, putative, Ty1-copia subclass, expressed (tuning gene expression during plant development salinity, played a major role in shaping genome structure).              | Wang <i>et al.</i> (1999)                                                                 |
|                       | <i>qSDW10</i> | 10   | 17499639-17503204 | 12              | <i>LOC_Os10g33310</i> | cyclin-dependent kinase inhibitor, putative, expressed (control cell growth, controlling cell cycle progression)                                                                           | De <i>et al.</i> (2017)<br>Vieira <i>et al.</i> (2017)                                    |
| Root length           | <i>qRL1</i>   | 1    | 10713139-10714271 | 16              | <i>LOC_Os01g18950</i> | peroxidase precursor, putative, expressed (increases protection against oxidative stress, highly tolerant to different stresses allowing survival when water supply is a limiting factor). | Prabhu <i>et al.</i> (1997)<br>Wang <i>et al.</i> (2011)<br>Martínez <i>et al.</i> (2021) |
| SPAD value            | <i>qSPAD7</i> | 7    | 23314482-23319154 | 20              | <i>LOC_Os07g38860</i> | OsGH3.10 - Probable indole-3-acetic acid-amidosynthetase, expressed                                                                                                                        | Ding <i>et al.</i> (2008)                                                                 |
| Na <sup>+</sup> conc. | <i>qNa2</i>   | 2    | 34274401-34276956 | 17              | <i>LOC_Os02g56010</i> | anthocyanidin 3-O-glucosyltransferase, putative, expressed                                                                                                                                 | Fukuchi-Mizutani <i>et al.</i> (2003)                                                     |
|                       | <i>qNa10</i>  | 10   | 17547961-17548260 | 11              | <i>LOC_Os10g33360</i> | expressed protein (drought-induced proteins, anther and pollen wall remodelling/metabolism proteins contribute to the tolerance of rice to salt stress)                                    | Ke <i>et al.</i> (2009)<br>Sarhadi <i>et al.</i> (2012)                                   |
| K <sup>+</sup> conc.  | <i>qK1</i>    | 1    | 39922192-39923794 | 16              | <i>LOC_Os01g68730</i> | RNA-binding protein FUS, putative, expressed (involved in cellular stress)                                                                                                                 | Tischbein <i>et al.</i> (2019)                                                            |

| Characters | QTL name      | Chr. | Position (bp)     | Number of locus | Candidate gene        | Possible function                                                                                                                                                                                            | Reference                                                                                |
|------------|---------------|------|-------------------|-----------------|-----------------------|--------------------------------------------------------------------------------------------------------------------------------------------------------------------------------------------------------------|------------------------------------------------------------------------------------------|
| Na-K ratio | <i>qNaK12</i> | 12   | 10048848-10053017 | 19              | <i>LOC_Os12g17530</i> | response, responses against pathogen infection ).<br>expressed protein (drought-induced proteins, anther and pollen wall remodelling/metabolism proteins contribute to the tolerance of rice to salt stress) | Woloshen <i>et al.</i> (2011)<br>Ke <i>et al.</i> (2009)<br>Sarhadi <i>et al.</i> (2012) |
