# Supplementary material for: Molecular Mapping to Discover Reliable Salinity-Resilient QTLs from the Novel Landrace Akundi in Two Bi-Parental Populations Using SNP-Based Genome-Wide Analysis in Rice
Source: MDPI journal article supplement (doi:10.3390/ijms241311141), 2023-07-06
Supplement: s1 [file s1]

**Supplementary Table S1:** List of SNP markers (SNP ID) used in the QTL analysis

| SNP Code | SNP Name      | SNP Code | SNP Name       | SNP Code | SNP Name            |
|----------|---------------|----------|----------------|----------|---------------------|
| M1       | chr01_194844  | M24      | chr01_9164508  | M47      | chr01_16596849      |
| M2       | chr01_375814  | M25      | chr01_10100605 | M48      | chr01_17008280      |
| M3       | chr01_717702  | M26      | chr01_10202227 | M49      | chr01_17219764      |
| M4       | chr01_932866  | M27      | chr01_10645259 | M50      | chr01_17426109      |
| M5       | chr01_1044946 | M28      | chr01_10846090 | M51      | chr01_18102213      |
| M6       | chr01_1175585 | M29      | chr01_11250486 | M52      | chr01_18332445      |
| M7       | chr01_1532281 | M30      | SALTOL-AUS     | M53      | chr01_18501890      |
| M8       | chr01_2100471 | M31      | SALTOL-ARO     | M54      | chr01_19008526      |
| M9       | chr01_2277961 | M32      | chr01_12216652 | M55      | chr01_19308987      |
| M10      | chr01_2532252 | M33      | chr01_12335190 | M56      | chr01_20262103      |
| M11      | chr01_2726468 | M34      | chr01_12809255 | M57      | chr01_20418175      |
| M12      | chr01_2865232 | M35      | chr01_12941687 | M58      | chr01_20562598      |
| M13      | chr01_3236648 | M36      | chr01_13442034 | M59      | chr01_21011077      |
| M14      | chr01_3529691 | M37      | chr01_13777831 | M60      | chr01_22554065      |
| M15      | chr01_4167976 | M38      | chr01_13902629 | M61      | IRGSP1_C01_22891448 |
| M16      | chr01_4307004 | M39      | chr01_14375630 | M62      | chr01_23091103      |
| M17      | chr01_5064126 | M40      | chr01_14508449 | M63      | chr01_23240729      |
| M18      | chr01_5510350 | M41      | chr01_14937939 | M64      | chr01_23656773      |
| M19      | chr01_6130240 | M42      | chr01_15092392 | M65      | IRGSP1_C01_23735018 |
| M20      | chr01_6543217 | M43      | chr01_15393352 | M66      | chr01_24050118      |
| M21      | chr01_7068516 | M44      | chr01_15883941 | M67      | chr01_24722142      |
| M22      | chr01_7563923 | M45      | chr01_16113201 | M68      | chr01_26187514      |

|                 |                 |                 |                 |                 |                    |
|-----------------|-----------------|-----------------|-----------------|-----------------|--------------------|
| M23             | chr01_8760562   | M46             | chr01_16284866  | M69             | chr01_27046296     |
| <b>SNP Code</b> | <b>SNP Name</b> | <b>SNP Code</b> | <b>SNP Name</b> | <b>SNP Code</b> | <b>SNP Name</b>    |
| M70             | chr01_27330724  | M93             | chr01_37680628  | M116            | chr02_890901       |
| M71             | chr01_28142020  | M94             | chr01_37920337  | M117            | DTY2-2_1           |
| M72             | chr01_28478660  | M95             | DTY1-1_1        | M118            | MS-IR36            |
| M73             | chr01_28826738  | M96             | DTY1-1_2        | M119            | chr02_1082416      |
| M74             | chr01_30569798  | M97             | chr01_38632196  | M120            | chr02_1380527      |
| M75             | chr01_31396842  | M98             | DTY1-1_3        | M121            | chr02_1487009      |
| M76             | chr01_32041358  | M99             | SCT1_1          | M122            | chr02_1660713      |
| M77             | chr01_32359998  | M100            | SCT1_2          | M123            | chr02_2008370      |
| M78             | chr01_32563460  | M101            | QSES1-2_1       | M124            | chr02_2334960      |
| M79             | chr01_32766139  | M102            | chr01_39548506  | M125            | DTY2-2_2           |
| M80             | chr01_33164035  | M103            | QSES1-2_2       | M126            | chr02_2819095      |
| M81             | chr01_33472174  | M104            | chr01_39955529  | M127            | chr02_2983451      |
| M82             | chr01_33695501  | M105            | QSES1-2_4       | M128            | chr02_3136771      |
| M83             | chr01_33901317  | M106            | chr01_40699488  | M129            | chr02_3477202      |
| M84             | chr01_34201543  | M107            | chr01_41020155  | M130            | chr02_3830712      |
| M85             | chr01_34363755  | M108            | chr01_41911439  | M131            | chr02_4047646      |
| M86             | chr01_34508997  | M109            | chr01_42425574  | M132            | chr02_4342883      |
| M87             | chr01_35259107  | M110            | chr01_42877440  | M133            | IRGSP1_C02_4549475 |
| M88             | chr01_35589637  | M111            | chr01_43074709  | M134            | chr02_4823175      |
| M89             | chr01_35794891  | M112            | chr02_103273    | M135            | DTY2-2_3           |
| M90             | chr01_36150523  | M113            | chr02_316859    | M136            | chr02_4930742      |
| M91             | chr01_36419842  | M114            | chr02_494373    | M137            | chr02_5836334      |

|                 |                 |                 |                     |                 |                     |
|-----------------|-----------------|-----------------|---------------------|-----------------|---------------------|
| M92             | chr01_37274755  | M115            | chr02_629512        | M138            | chr02_6373446       |
| <b>SNP Code</b> | <b>SNP Name</b> | <b>SNP Code</b> | <b>SNP Name</b>     | <b>SNP Code</b> | <b>SNP Name</b>     |
| M139            | chr02_6805305   | M162            | chr02_20824958      | M185            | chr02_29568762      |
| M140            | chr02_7238793   | M163            | chr02_21060669      | M186            | chr02_29718772      |
| M141            | chr02_7342223   | M164            | chr02_21832777      | M187            | chr02_30345735      |
| M142            | chr02_8019748   | M165            | chr02_22340836      | M188            | chr02_30530432      |
| M143            | chr02_8814718   | M166            | chr02_23073414      | M189            | chr02_31135814      |
| M144            | chr02_9570228   | M167            | IRGSP1_C02_23246863 | M190            | chr02_31403314      |
| M145            | chr02_9801099   | M168            | chr02_23396915      | M191            | chr02_31678155      |
| M146            | chr02_9975660   | M169            | chr02_23538743      | M192            | chr02_31914486      |
| M147            | HIS1            | M170            | chr02_23852677      | M193            | chr02_32101050      |
| M148            | chr02_10555263  | M171            | chr02_24168273      | M194            | chr02_32303539      |
| M149            | chr02_10874369  | M172            | chr02_24264653      | M195            | chr02_33035683      |
| M150            | chr02_11701123  | M173            | chr02_24772301      | M196            | chr02_34072964      |
| M151            | chr02_13962476  | M174            | chr02_24887320      | M197            | chr02_34425408      |
| M152            | chr02_16464872  | M175            | chr02_25193353      | M198            | chr02_34707946      |
| M153            | chr02_16919033  | M176            | chr02_25415397      | M199            | IRGSP1_C02_34852782 |
| M154            | chr02_17160895  | M177            | chr02_25949636      | M200            | chr02_34868096      |
| M155            | chr02_17497082  | M178            | chr02_26406867      | M201            | chr02_35216781      |
| M156            | chr02_17789129  | M179            | chr02_27548893      | M202            | chr02_35401891      |
| M157            | chr02_18370293  | M180            | chr02_28049479      | M203            | chr02_35568365      |
| M158            | chr02_18811812  | M181            | chr02_28211032      | M204            | chr02_35818319      |
| M159            | chr02_19642635  | M182            | chr02_28778297      | M205            | chr03_484812        |
| M160            | chr02_19981768  | M183            | chr02_29011747      | M206            | chr03_851785        |

|                 |                    |                 |                     |                 |                 |
|-----------------|--------------------|-----------------|---------------------|-----------------|-----------------|
| M161            | chr02_20145859     | M184            | chr02_29415200      | M207            | DTY3-2-SWARNA_1 |
| <b>SNP Code</b> | <b>SNP Name</b>    | <b>SNP Code</b> | <b>SNP Name</b>     | <b>SNP Code</b> | <b>SNP Name</b> |
| M208            | DTY3-2-IR64_1      | M231            | chr03_9636224       | M254            | chr03_19929911  |
| M209            | DTY3-2-N22_1       | M232            | chr03_9751213       | M255            | chr03_20664396  |
| M210            | chr03_1270943      | M233            | chr03_9878813       | M256            | chr03_21003404  |
| M211            | chr03_1481412      | M234            | chr03_10184356      | M257            | chr03_22050510  |
| M212            | chr03_1761412      | M235            | chr03_10304250      | M258            | chr03_22633713  |
| M213            | chr03_2151496      | M236            | chr03_10544320      | M259            | chr03_23037368  |
| M214            | chr03_2885423      | M237            | chr03_10798982      | M260            | chr03_23354868  |
| M215            | chr03_3382980      | M238            | chr03_11644944      | M261            | chr03_23851835  |
| M216            | chr03_3657643      | M239            | chr03_11851886      | M262            | chr03_24413888  |
| M217            | chr03_4047654      | M240            | chr03_12564300      | M263            | chr03_24682521  |
| M218            | chr03_4321231      | M241            | chr03_13224089      | M264            | chr03_25157655  |
| M219            | chr03_5109298      | M242            | chr03_13932387      | M265            | chr03_25259336  |
| M220            | chr03_5880211      | M243            | chr03_14169727      | M266            | chr03_25530777  |
| M221            | chr03_6283461      | M244            | chr03_14554651      | M267            | chr03_25833182  |
| M222            | chr03_6902921      | M245            | IRGSP1_C03_14933451 | M268            | chr03_26334305  |
| M223            | chr03_7200676      | M246            | chr03_15072791      | M269            | chr03_26456796  |
| M224            | chr03_7605347      | M247            | chr03_15365726      | M270            | chr03_26982172  |
| M225            | IRGSP1_C03_7752789 | M248            | GS3                 | M271            | chr03_27275567  |
| M226            | chr03_7798537      | M249            | chr03_17307455      | M272            | chr03_27494934  |
| M227            | chr03_8532555      | M250            | chr03_17827706      | M273            | chr03_27813704  |
| M228            | chr03_8711509      | M251            | chr03_18273682      | M274            | chr03_28851199  |
| M229            | chr03_9026803      | M252            | chr03_18629240      | M275            | chr03_29152266  |

|                 |                 |                 |                    |                 |                 |
|-----------------|-----------------|-----------------|--------------------|-----------------|-----------------|
| M230            | chr03_9375374   | M253            | chr03_19667207     | M276            | chr03_29430694  |
| <b>SNP Code</b> | <b>SNP Name</b> | <b>SNP Code</b> | <b>SNP Name</b>    | <b>SNP Code</b> | <b>SNP Name</b> |
| M277            | chr03_30247826  | M300            | IRGSP1_C04_602842  | M323            | chr04_10991011  |
| M278            | chr03_30604896  | M301            | DTY4-1_2           | M324            | chr04_11645506  |
| M279            | DTY3-1_2        | M302            | chr04_1022225      | M325            | chr04_11879947  |
| M280            | chr03_31025197  | M303            | chr04_1136986      | M326            | chr04_12594753  |
| M281            | chr03_31190989  | M304            | chr04_1719865      | M327            | chr04_12665796  |
| M282            | DTY3-1_4        | M305            | DTY4-1_3           | M328            | chr04_12684621  |
| M283            | chr03_31427789  | M306            | chr04_3411505      | M329            | chr04_12711415  |
| M284            | chr03_31614921  | M307            | IRGSP1_C04_4319691 | M330            | chr04_12955347  |
| M285            | chr03_32063693  | M308            | chr04_4456304      | M331            | chr04_13551673  |
| M286            | chr03_32430702  | M309            | chr04_5111222      | M332            | chr04_13665093  |
| M287            | chr03_32577650  | M310            | chr04_5526487      | M333            | chr04_14229856  |
| M288            | chr03_32832500  | M311            | chr04_6027557      | M334            | chr04_14814591  |
| M289            | chr03_33080942  | M312            | chr04_6596219      | M335            | chr04_15389648  |
| M290            | chr03_33713486  | M313            | chr04_6913215      | M336            | chr04_15944977  |
| M291            | chr03_34275405  | M314            | BPH17_1            | M337            | chr04_16289829  |
| M292            | chr03_34476308  | M315            | BPH17_3            | M338            | chr04_16715200  |
| M293            | chr03_34678981  | M316            | BPH17_2            | M339            | chr04_17465113  |
| M294            | chr03_35093761  | M317            | chr04_7170237      | M340            | chr04_17666183  |
| M295            | chr03_35636092  | M318            | chr04_7304413      | M341            | chr04_18136052  |
| M296            | chr03_35824355  | M319            | chr04_7871436      | M342            | chr04_18706317  |
| M297            | chr03_36206765  | M320            | chr04_8217877      | M343            | chr04_19123643  |
| M298            | DTY4-1_1        | M321            | chr04_10077188     | M344            | chr04_19353709  |

|                 |                 |                 |                 |                 |                 |
|-----------------|-----------------|-----------------|-----------------|-----------------|-----------------|
| M299            | chr04_193676    | M322            | chr04_10468507  | M345            | chr04_20507218  |
| <b>SNP Code</b> | <b>SNP Name</b> | <b>SNP Code</b> | <b>SNP Name</b> | <b>SNP Code</b> | <b>SNP Name</b> |
| M346            | chr04_21237749  | M369            | COLD1-JAP       | M392            | chr05_3092113   |
| M347            | chr04_21517348  | M370            | chr04_30438901  | M393            | chr05_3470087   |
| M348            | chr04_21864875  | M371            | chr04_30879875  | M394            | chr05_3817643   |
| M349            | chr04_22435296  | M372            | NAL1            | M395            | chr05_4205413   |
| M350            | chr04_22808095  | M373            | TBV1_2          | M396            | chr05_4589783   |
| M351            | chr04_23046635  | M374            | chr04_31509863  | M397            | chr05_4819475   |
| M352            | chr04_23248365  | M375            | chr04_32038496  | M398            | chr05_4953754   |
| M353            | chr04_23846299  | M376            | chr04_32189893  | M399            | GW5_1           |
| M354            | chr04_24061518  | M377            | chr04_33073892  | M400            | GW5_2           |
| M355            | RYMV1-5         | M378            | chr04_33448911  | M401            | chr05_6129755   |
| M356            | RYMV1-2         | M379            | chr04_34643455  | M402            | chr05_6544781   |
| M357            | chr04_25245272  | M380            | chr04_34925111  | M403            | chr05_6607675   |
| M358            | chr04_25437295  | M381            | chr04_35395197  | M404            | chr05_6833061   |
| M359            | chr04_26309089  | M382            | chr05_44806     | M405            | chr05_7195992   |
| M360            | chr04_26545849  | M383            | chr05_201193    | M406            | chr05_7328783   |
| M361            | chr04_26832471  | M384            | chr05_437499    | M407            | chr05_7706179   |
| M362            | chr04_27540988  | M385            | chr05_440644    | M408            | chr05_8080666   |
| M363            | chr04_28004788  | M386            | chr05_661832    | M409            | chr05_8384781   |
| M364            | chr04_28901886  | M387            | chr05_922530    | M410            | chr05_8585466   |
| M365            | chr04_29533215  | M388            | chr05_1487229   | M411            | chr05_9712988   |
| M366            | chr04_29715617  | M389            | chr05_1832604   | M412            | chr05_10539124  |
| M367            | chr04_29881066  | M390            | chr05_2045112   | M413            | chr05_10886331  |

|                 |                     |                 |                 |                 |                 |
|-----------------|---------------------|-----------------|-----------------|-----------------|-----------------|
| M368            | chr04_30174083      | M391            | chr05_2291156   | M414            | chr05_11679660  |
| <b>SNP Code</b> | <b>SNP Name</b>     | <b>SNP Code</b> | <b>SNP Name</b> | <b>SNP Code</b> | <b>SNP Name</b> |
| M415            | chr05_13325546      | M438            | chr05_23143060  | M461            | WX-A_GROUP      |
| M416            | chr05_13768744      | M439            | chr05_23661597  | M462            | WX-A-RC222      |
| M417            | IRGSP1_C05_13854594 | M440            | chr05_24090514  | M463            | chr06_1768998   |
| M418            | chr05_14412355      | M441            | chr05_25234430  | M464            | chr06_2430760   |
| M419            | chr05_14928105      | M442            | chr05_27086886  | M465            | chr06_2535102   |
| M420            | chr05_16262586      | M443            | chr05_27531788  | M466            | chr06_2783620   |
| M421            | chr05_16500527      | M444            | chr05_27627633  | M467            | chr06_2808467   |
| M422            | chr05_16752221      | M445            | chr05_27899049  | M468            | chr06_3140863   |
| M423            | chr05_16955234      | M446            | chr05_28101376  | M469            | chr06_3244503   |
| M424            | chr05_17012134      | M447            | chr05_28344771  | M470            | chr06_3431721   |
| M425            | chr05_17017106      | M448            | chr05_28772543  | M471            | chr06_3598843   |
| M426            | chr05_18405433      | M449            | chr05_29100308  | M472            | chr06_3632725   |
| M427            | chr05_18816269      | M450            | chr06_244274    | M473            | chr06_3721346   |
| M428            | chr05_19098650      | M451            | chr06_400753    | M474            | chr06_3951547   |
| M429            | chr05_19155333      | M452            | chr06_646915    | M475            | chr06_4076903   |
| M430            | chr05_19516545      | M453            | chr06_677288    | M476            | chr06_4641044   |
| M431            | chr05_19723342      | M454            | BPH32           | M477            | chr06_4757948   |
| M432            | chr05_19974373      | M455            | chr06_1272777   | M478            | chr06_5195334   |
| M433            | chr05_20331215      | M456            | chr06_1378891   | M479            | chr06_5707236   |
| M434            | chr05_20551103      | M457            | chr06_1521855   | M480            | chr06_5894169   |
| M435            | chr05_21494622      | M458            | chr06_1768006   | M481            | chr06_6093491   |
| M436            | chr05_22295097      | M459            | WX-OP           | M482            | chr06_6508525   |

|             |                |             |                |             |                |
|-------------|----------------|-------------|----------------|-------------|----------------|
| M437        | chr05_22711811 | M460        | WX-INT         | M483        | SSIIA-3B       |
| SNP<br>Code | SNP Name       | SNP<br>Code | SNP Name       | SNP<br>Code | SNP Name       |
| M484        | chr06_7629011  | M507        | chr06_20462203 | M530        | chr06_29208264 |
| M485        | chr06_8153078  | M508        | chr06_21246829 | M531        | chr06_29416997 |
| M486        | chr06_8405025  | M509        | chr06_21491695 | M532        | chr06_30809492 |
| M487        | chr06_9222038  | M510        | chr06_21818860 | M533        | chr07_514293   |
| M488        | chr06_9836381  | M511        | chr06_22371041 | M534        | chr07_770090   |
| M489        | chr06_10006906 | M512        | chr06_24003856 | M535        | chr07_940832   |
| M490        | PI9_1          | M513        | TGW6           | M536        | chr07_1058718  |
| M491        | chr06_10418594 | M514        | chr06_25277863 | M537        | chr07_1195861  |
| M492        | chr06_10966744 | M515        | chr06_26139965 | M538        | chr07_1317761  |
| M493        | chr06_11131403 | M516        | chr06_26513610 | M539        | chr07_1432567  |
| M494        | chr06_11692013 | M517        | chr06_26938344 | M540        | chr07_1558687  |
| M495        | chr06_12989252 | M518        | chr06_27275515 | M541        | chr07_1865306  |
| M496        | chr06_13702743 | M519        | chr06_27364485 | M542        | chr07_2128881  |
| M497        | chr06_14006726 | M520        | chr06_27627615 | M543        | chr07_2331583  |
| M498        | chr06_14504992 | M521        | chr06_27761109 | M544        | chr07_4481788  |
| M499        | chr06_15358704 | M522        | XA7_1          | M545        | chr07_5442983  |
| M500        | chr06_15538142 | M523        | XA7_2          | M546        | chr07_5729056  |
| M501        | chr06_16304717 | M524        | chr06_28100960 | M547        | chr07_6029723  |
| M502        | chr06_16614854 | M525        | chr06_28107682 | M548        | chr07_7317122  |
| M503        | chr06_16806254 | M526        | XA7_3          | M549        | chr07_8140854  |
| M504        | chr06_17076390 | M527        | chr06_28201282 | M550        | chr07_8320872  |
| M505        | chr06_17698448 | M528        | chr06_28723997 | M551        | chr07_8487862  |



|             |                     |             |                |             |               |
|-------------|---------------------|-------------|----------------|-------------|---------------|
| M506        | chr06_19989362      | M529        | chr06_29056693 | M552        | GHD7-4        |
| SNP<br>Code | SNP Name            | SNP<br>Code | SNP Name       | SNP<br>Code | SNP Name      |
| M553        | chr07_11290725      | M576        | AG3_2          | M599        | chr08_3866523 |
| M554        | chr07_13639513      | M577        | chr07_24194267 | M600        | chr08_4190544 |
| M555        | chr07_14729119      | M578        | chr07_24313817 | M601        | DTH8-IR24     |
| M556        | chr07_15340454      | M579        | chr07_24507157 | M602        | chr08_4511882 |
| M557        | IRGSP1_C07_16037152 | M580        | chr07_25339609 | M603        | chr08_4853081 |
| M558        | chr07_16313631      | M581        | chr07_25935801 | M604        | GM4_1         |
| M559        | IRGSP1_C07_19408599 | M582        | chr07_27021585 | M605        | chr08_5394572 |
| M560        | chr07_17654305      | M583        | chr07_27883987 | M606        | GM4_3         |
| M561        | chr07_17877865      | M584        | chr07_28187994 | M607        | GM4_4         |
| M562        | chr07_18208798      | M585        | chr07_28409912 | M608        | chr08_5634800 |
| M563        | chr07_18503646      | M586        | chr07_29062014 | M609        | PI33_1        |
| M564        | chr07_18689329      | M587        | chr08_213580   | M610        | chr08_6269190 |
| M565        | chr07_18895399      | M588        | chr08_658032   | M611        | PI33_2        |
| M566        | chr07_20514892      | M589        | chr08_811201   | M612        | PI33_3        |
| M567        | chr07_21135004      | M590        | chr08_1088007  | M613        | chr08_7854002 |
| M568        | chr07_21539524      | M591        | chr08_1198055  | M614        | chr08_7950638 |
| M569        | TSV1_UM             | M592        | chr08_1836529  | M615        | chr08_8386031 |
| M570        | chr07_22277144      | M593        | chr08_2208785  | M616        | chr08_8580913 |
| M571        | chr07_22593213      | M594        | chr08_2673447  | M617        | chr08_8703041 |
| M572        | chr07_23087994      | M595        | chr08_2878924  | M618        | chr08_8897653 |
| M573        | AG3_1               | M596        | chr08_3212821  | M619        | chr08_9289473 |
| M574        | chr07_23535052      | M597        | chr08_3365127  | M620        | chr08_9769758 |

|             |                     |             |                     |             |                     |
|-------------|---------------------|-------------|---------------------|-------------|---------------------|
| M575        | chr07_23785728      | M598        | chr08_3682006       | M621        | chr08_10105233      |
| SNP<br>Code | SNP Name            | SNP<br>Code | SNP Name            | SNP<br>Code | SNP Name            |
| M622        | chr08_10188041      | M645        | chr08_17618902      | M668        | chr08_26709228      |
| M623        | chr08_10358484      | M646        | chr08_18108496      | M669        | XA13_2              |
| M624        | IRGSP1_C08_10441781 | M647        | chr08_18221884      | M670        | chr08_26755059      |
| M625        | chr08_11248949      | M648        | chr08_18552226      | M671        | chr08_26898822      |
| M626        | chr08_11370680      | M649        | chr08_18719247      | M672        | chr08_27039158      |
| M627        | chr08_11565636      | M650        | chr08_19351882      | M673        | IRGSP1_C08_27133000 |
| M628        | chr08_11727432      | M651        | chr08_19833397      | M674        | chr08_27282645      |
| M629        | chr08_11888511      | M652        | chr08_20053642      | M675        | chr08_27563586      |
| M630        | chr08_12145970      | M653        | chr08_21011651      | M676        | chr08_28125942      |
| M631        | chr08_12421145      | M654        | chr08_21253397      | M677        | chr09_148594        |
| M632        | chr08_12723619      | M655        | chr08_21667240      | M678        | chr09_496013        |
| M633        | chr08_13017690      | M656        | chr08_22252502      | M679        | chr09_591085        |
| M634        | chr08_13354771      | M657        | chr08_22776414      | M680        | chr09_1098249       |
| M635        | chr08_13741571      | M658        | chr08_23713744      | M681        | chr09_1467951       |
| M636        | chr08_13950899      | M659        | chr08_24125399      | M682        | chr09_2096551       |
| M637        | chr08_14184612      | M660        | chr08_24205833      | M683        | chr09_2298381       |
| M638        | chr08_14676962      | M661        | chr08_24753844      | M684        | chr09_2380203       |
| M639        | chr08_14799421      | M662        | IRGSP1_C08_24853648 | M685        | chr09_2930321       |
| M640        | chr08_14986111      | M663        | WFP1                | M686        | chr09_3357568       |
| M641        | chr08_15439243      | M664        | chr08_25467581      | M687        | chr09_3603443       |
| M642        | chr08_16618829      | M665        | chr08_25757847      | M688        | chr09_3934768       |
| M643        | chr08_16799413      | M666        | PGWC8-2             | M689        | chr09_4136552       |

|             |                    |             |                |             |                |
|-------------|--------------------|-------------|----------------|-------------|----------------|
| M644        | chr08_17319167     | M667        | chr08_26448560 | M690        | chr09_4347203  |
| SNP<br>Code | SNP Name           | SNP<br>Code | SNP Name       | SNP<br>Code | SNP Name       |
| M691        | chr09_5008706      | M714        | AG1_1          | M737        | chr10_790044   |
| M692        | chr09_5305969      | M715        | chr09_12326525 | M738        | chr10_1562931  |
| M693        | chr09_5812738      | M716        | chr09_14920092 | M739        | chr10_2129424  |
| M694        | chr09_5922125      | M717        | chr09_15322775 | M740        | chr10_2258418  |
| M695        | chr09_6093984      | M718        | chr09_15429734 | M741        | chr10_3358419  |
| M696        | IRGSP1_C09_6205891 | M719        | DEP1-1         | M742        | chr10_3400212  |
| M697        | chr09_6252407      | M720        | DEP1-2         | M743        | chr10_4019997  |
| M698        | chr09_6796269      | M721        | chr09_16616509 | M744        | chr10_4281052  |
| M699        | chr09_6913547      | M722        | chr09_17213519 | M745        | chr10_5257224  |
| M700        | chr09_7116276      | M723        | chr09_17447522 | M746        | chr10_5488256  |
| M701        | chr09_7280339      | M724        | chr09_17707080 | M747        | chr10_5826161  |
| M702        | chr09_8511436      | M725        | chr09_19322095 | M748        | chr10_6648158  |
| M703        | chr09_8851945      | M726        | chr09_19683788 | M749        | chr10_6798684  |
| M704        | chr09_9252104      | M727        | chr09_20138174 | M750        | chr10_7120214  |
| M705        | chr09_9626056      | M728        | chr09_20682114 | M751        | chr10_7397104  |
| M706        | chr09_9945591      | M729        | chr09_21148430 | M752        | chr10_7530092  |
| M707        | chr09_10119114     | M730        | chr09_21348882 | M753        | chr10_8404652  |
| M708        | chr09_10324014     | M731        | chr09_21612758 | M754        | chr10_8795028  |
| M709        | chr09_10757351     | M732        | chr09_21667022 | M755        | chr10_9095431  |
| M710        | chr09_11237877     | M733        | chr09_21885499 | M756        | chr10_10476379 |
| M711        | chr09_11746684     | M734        | chr09_21896910 | M757        | chr10_10755400 |
| M712        | chr09_11848827     | M735        | chr09_22076185 | M758        | chr10_11195773 |

|             |                     |             |                |             |                |
|-------------|---------------------|-------------|----------------|-------------|----------------|
| M713        | chr09_12029697      | M736        | chr10_146531   | M759        | chr10_11664750 |
| SNP<br>Code | SNP Name            | SNP<br>Code | SNP Name       | SNP<br>Code | SNP Name       |
| M760        | chr10_11918679      | M783        | chr10_19678268 | M806        | chr11_9933184  |
| M761        | IRGSP1_C10_12035291 | M784        | chr10_19899160 | M807        | chr11_10741559 |
| M762        | chr10_12145295      | M785        | chr10_21338558 | M808        | chr11_11715177 |
| M763        | chr10_12658334      | M786        | chr10_21596449 | M809        | chr11_12142966 |
| M764        | chr10_12780901      | M787        | chr11_256688   | M810        | chr11_12583306 |
| M765        | chr10_13551338      | M788        | chr11_650148   | M811        | chr11_13020856 |
| M766        | chr10_13778768      | M789        | chr11_2393690  | M812        | chr11_13926471 |
| M767        | chr10_14086902      | M790        | chr11_2875870  | M813        | chr11_14737362 |
| M768        | chr10_14640458      | M791        | chr11_3516253  | M814        | chr11_15447862 |
| M769        | chr10_14777004      | M792        | chr11_3802930  | M815        | chr11_15638505 |
| M770        | chr10_15824876      | M793        | chr11_4783262  | M816        | chr11_15850522 |
| M771        | chr10_16229530      | M794        | chr11_5615885  | M817        | chr11_16284824 |
| M772        | chr10_16742656      | M795        | chr11_5852961  | M818        | chr11_17047762 |
| M773        | chr10_17397576      | M796        | chr11_6088667  | M819        | chr11_17292835 |
| M774        | chr10_18098744      | M797        | chr11_6472086  | M820        | chr11_17489208 |
| M775        | chr10_18302926      | M798        | chr11_7542820  | M821        | chr11_17697337 |
| M776        | chr10_18583084      | M799        | chr11_8083891  | M822        | chr11_17908099 |
| M777        | RF4                 | M800        | chr11_8247118  | M823        | STV11          |
| M778        | chr10_18852690      | M801        | chr11_8601502  | M824        | SWEET14_PRO1   |
| M779        | chr10_19025553      | M802        | chr11_8786491  | M825        | SWEET14_2      |
| M780        | chr10_19217152      | M803        | chr11_9183139  | M826        | chr11_18290104 |
| M781        | chr10_19378143      | M804        | chr11_9413614  | M827        | chr11_18936070 |

|             |                     |             |                     |             |                |
|-------------|---------------------|-------------|---------------------|-------------|----------------|
| M782        | chr10_19421322      | M805        | chr11_9561302       | M828        | chr11_18993024 |
| SNP<br>Code | SNP Name            | SNP<br>Code | SNP Name            | SNP<br>Code | SNP Name       |
| M829        | chr11_19648542      | M852        | chr11_24086107      | M875        | chr12_2324105  |
| M830        | chr11_19898835      | M853        | chr11_24100905      | M876        | chr12_2651274  |
| M831        | chr11_20074439      | M854        | chr11_24585862      | M877        | chr12_3086293  |
| M832        | chr11_20239426      | M855        | chr11_25135188      | M878        | chr12_3217524  |
| M833        | chr11_20647651      | M856        | PI54_5              | M879        | chr12_3285571  |
| M834        | chr11_20837771      | M857        | chr11_25279481      | M880        | chr12_3544726  |
| M835        | chr11_21190115      | M858        | chr11_25432067      | M881        | chr12_4141420  |
| M836        | chr11_21446099      | M859        | chr11_25811598      | M882        | chr12_4433511  |
| M837        | chr11_21689303      | M860        | chr11_26300403      | M883        | chr12_4554103  |
| M838        | chr11_21691103      | M861        | IRGSP1_C11_27391141 | M884        | chr12_5041059  |
| M839        | chr11_22044151      | M862        | IRGSP1_C11_27571141 | M885        | chr12_7114076  |
| M840        | XA23_2              | M863        | chr11_27603799      | M886        | chr12_7445812  |
| M841        | IRGSP1_C11_22303236 | M864        | chr11_27817978      | M887        | chr12_7917509  |
| M842        | chr11_22440795      | M865        | chr11_27994133      | M888        | chr12_8070782  |
| M843        | chr11_22453819      | M866        | PIK_2               | M889        | chr12_8240608  |
| M844        | chr11_22562351      | M867        | PIK_1               | M890        | chr12_8794364  |
| M845        | PB1_1               | M868        | PIKH_2              | M891        | chr12_8913217  |
| M846        | chr11_22912310      | M869        | PIKH_1              | M892        | chr12_9120135  |
| M847        | chr11_23023708      | M870        | XA26_1              | M893        | chr12_9540170  |
| M848        | chr11_23080452      | M871        | chr11_28625316      | M894        | chr12_10051752 |
| M849        | chr11_23083051      | M872        | XA4_2               | M895        | chr12_10469146 |
| M850        | chr11_23231455      | M873        | chr11_28966693      | M896        | chr12_10509878 |

|             |                     |             |                |             |                |
|-------------|---------------------|-------------|----------------|-------------|----------------|
| M851        | IRGSP1_C11_23731426 | M874        | chr12_350921   | M897        | chr12_11257069 |
| SNP<br>Code | SNP Name            | SNP<br>Code | SNP Name       | SNP<br>Code | SNP Name       |
| M898        | chr12_11720114      | M914        | chr12_16591134 | M930        | chr12_23190179 |
| M899        | chr12_12075622      | M915        | chr12_16990670 | M931        | chr12_23387696 |
| M900        | chr12_12509917      | M916        | DTY12-1_2      | M932        | chr12_23828922 |
| M901        | chr12_12904225      | M917        | chr12_17443323 | M933        | chr12_24088209 |
| M902        | chr12_13248798      | M918        | chr12_17571574 | M934        | chr12_24145303 |
| M903        | chr12_13764151      | M919        | chr12_18003414 | M935        | chr12_24317071 |
| M904        | chr12_14060565      | M920        | chr12_18881059 | M936        | chr12_24417433 |
| M905        | chr12_14489210      | M921        | chr12_19161731 | M937        | chr12_24705450 |
| M906        | chr12_14599449      | M922        | chr12_19522102 | M938        | chr12_24913573 |
| M907        | chr12_14835375      | M923        | chr12_19578931 | M939        | chr12_25490919 |
| M908        | chr12_14936674      | M924        | chr12_19829588 | M940        | chr12_25756224 |
| M909        | chr12_15140411      | M925        | chr12_21446549 | M941        | chr12_26259494 |
| M910        | chr12_15342492      | M926        | chr12_21731719 | M942        | chr12_26463351 |
| M911        | IRGSP1_C12_15966147 | M927        | chr12_22600624 | M943        | chr12_26665728 |
| M912        | chr12_15960393      | M928        | chr12_23066809 | M944        | chr12_27023424 |
| M913        | chr12_16287347      | M929        | chr12_23108164 | M945        | chr12_27304351 |
