# Supplementary material for: Molecular Mapping to Discover Reliable Salinity-Resilient QTLs from the Novel Landrace Akundi in Two Bi-Parental Populations Using SNP-Based Genome-Wide Analysis in Rice
Source: MDPI journal article supplement (doi:10.3390/ijms241311141), 2023-07-06
Supplement: s1 [file s1]

**Supplementary Table S4** Comparisons of the QTL regions identified in this study for salinity tolerance at seedling stage, with previously mapped QTLs from different populations and for different growth stages

| Gene/QTL name   | Chr. | Growth Stage | Mapping Population | Evaluation index                   | Interval/peak  | Position (cM)                      | PVE (%) | References                                                                    | Remarks |
|-----------------|------|--------------|--------------------|------------------------------------|----------------|------------------------------------|---------|-------------------------------------------------------------------------------|---------|
| QNa             | 1    | Seedling     | RIL                | High Na uptake                     |                |                                    |         | Flowers et al. 2000 qNa2 (134.4 cM), qNa10 (68.8cM) – This study              | Absent  |
| Trait-based QTL | 1    | Seedling     | RIL                | Na <sup>+</sup> uptake             | E12M55-3       | 74 cM                              | 8.9     | Koyama et al. 2001 <i>qNa2</i> (134.4 cM), <i>qNa10</i> (68.8cM) – This study | „       |
| Trait-based QTL | 1    | Seedling     | RIL                | K <sup>+</sup> concentration       | E12M37-1       | 56 cM                              | 10.6    | Koyama et al. 2001 <i>qK1</i> (156.5 cM) – This study                         | Novel   |
| Trait-based QTL | 1    | Seedling     | RIL                | Na: K ratio                        | E12M57-1       | 74 cM                              | 9.1     | Koyama et al. 2001 <i>qNaKR12</i> (39.4 cM) – This study                      | Absent  |
| <i>Saltol</i>   | 1    | Seedling     | RIL                | Na <sup>+</sup> uptake             | RM140 - C1733S | between 51.6 and 65.9cM / 13.87 Mb | 39.2    | Bonilla et al. 2002 <i>qSUR11</i> (21 cM) – This study                        | Novel   |
| <i>Saltol</i>   | 1    | Seedling     | RIL                | K <sup>+</sup> uptake              | RM140 - C1733S | between 51.6 and 65.9cM / 13.87 Mb | 43.9    | „ <i>qK1</i> (156.5 cM) – This study                                          | „       |
| <i>Saltol</i>   | 1    | Seedling     | RIL                | Na/K ratio                         | RM140 - C1733S | between 51.6 and 65.9cM / 13.87 Mb | 43.2    | „ <i>qNaKR12</i> (39.4 cM) – This study                                       | „       |
| <i>qSDW1</i>    | 1    | Seedling     | BIL                | Shoot dry weight                   | 36.09-36.28    | 0.75 cM                            | 28.6    | Nakhla et al. 2021 <i>qSDW1</i> (123.4 cM), <i>qSDW10</i> (68.6) – This study | „       |
| <i>qSDS-1</i>   | 1    | Seedling     | F <sub>2:3</sub>   | Seedling survival                  | C813 - C86     | -                                  | 18.0    | Lin et al. 2004 <i>qSUR11</i> (21 cM) – This study                            | Novel   |
| <i>qSKC-1</i>   | 1    | Seedling     | F <sub>2:3</sub>   | Shoot K <sup>+</sup> concentration | C1211 - S2139  | -                                  | 40.1    | „ <i>qK1</i> (156.5 cM) – This study                                          | Absent  |

| Gene/QTL name          | Chr. | Growth Stage | Mapping Population | Evaluation index                    | Interval/peak           | Position (cM) | PVE (%) | References                                                                      | Remarks |
|------------------------|------|--------------|--------------------|-------------------------------------|-------------------------|---------------|---------|---------------------------------------------------------------------------------|---------|
| <i>qRNTQ-1</i>         | 1    | Seedling     | F <sub>2:3</sub>   | Root Na <sup>+</sup> total quantity | C813 - C86              | -             | 12.4    | „                                                                               | „       |
| <i>OsHKT1;5 (SKC1)</i> | 1    | Seedling     | Advanced backcross | Shoot K <sup>+</sup> concentration  | K159 - K061             | 11.46 Mb      | -       | Ren et al. 2005<br><i>qK1</i> (156.5 cM) – This study                           | Absent  |
| <i>qST1</i>            | 1    | Seedling     | RIL                |                                     | Est1-2 & RZ569A         | 40 cM         | 27.8    | Lee et al. 2006                                                                 | „       |
| <i>qSESI</i>           | 1    | Seedling     | F <sub>2</sub>     | SES                                 | RM8094-<br>RM582        | -             | 19.6    | Bimpong et al. 2014 <i>qSESI</i> (151.8 cM) – This study                        | Novel   |
| <i>qSur1.1</i>         | 1    | Seedling     | F <sub>2</sub>     | Survival                            | RM472-RM14              | 162.9 cM      | 16.0    | Rahman et al. 2019 <i>qSUR11</i> (21 cM) – This study                           | Novel   |
| <i>qSL1.1</i>          | 1    | Seedling     | RIL                | Shoot length                        | id1023892–<br>id1024836 | 162.6 cM      | 20.6    | Bizimana et al. 2017 <i>qSL1</i> (156 cM), <i>qSL8</i> (22 cM) – This study     | Same    |
| <i>qSL1.2</i>          | 1    | Seedling     | RIL                | Shoot length                        | id1024972–<br>id1025983 | 168.6 cM      | 11.8    | „, <i>qSL1</i> (156 cM), <i>qSL8</i> (22 cM) – This study                       | Absent  |
| <i>qSIS1.39</i>        | 1    | Seedling     | IL                 | Salt injury score (SIS)             | RM3810                  | 39.5 cM       | 6.4     | De Leon et al. 2017                                                             | Novel   |
| <i>qSHL1.39</i>        | 1    | Seedling     | IL                 | Shoot length                        | RM3810                  | 39.5 cM       | 8.2     | „, <i>qSL1</i> (156 cM), <i>qSL8</i> (22 cM) – This study                       | Same    |
| <i>qSHL1.41</i>        | 1    | Seedling     | IL                 | Shoot length                        | RM5362                  | 41.1 cM       | 6.8     | „                                                                               | -       |
| <i>qK2</i>             | 2    | Seedling     | BIL                | K <sup>+</sup> uptake               | 19.80-20.15             | 1.37 cM       | 26.1    | Nakhla et al. 2021<br><i>qK1</i> (156.5 cM) – This study                        | „       |
| <i>qSHL2.3</i>         | 2    | Seedling     | IL                 | Shoot length                        | RM211                   | 3.0 cM        | 6.6     | „                                                                               | Absent  |
| <i>qYLD2.1</i>         | 2    | Reproductive | F <sub>2</sub>     | Yield                               | Id2004774               | 40.1cM        | 14.6    | Mondal et al. 2019                                                              | „       |
| <i>qSES2.1</i>         | 2    | Seedling     | RIL                | SES                                 | id2004774–<br>id2007526 | 64.8 cM       | 11.1    | Bizimana et al. 2017 <i>qSESI</i> (151.8 cM) – This study<br>Mondal et al. 2019 | „       |
| <i>qNFS2.1</i>         | 2    | Reproductive | F <sub>2</sub>     | Filled spikelet                     |                         | 40.1 cM       | 15.3    | „                                                                               | „       |
| <i>qPFS2.1</i>         | 2    | Reproductive | F <sub>2</sub>     | number                              | id2004774               | 122.1 cM      | 18.4    | Nakhla et al. 2021                                                              | „       |
| <i>qNa2.1</i>          | 2    | Reproductive | BIL                | Filled spikelet (%)                 | id20133434<br>4.15-4.26 | 0.43 cM       | 5.3     | „                                                                               | „       |
| <i>qNa2.2</i>          | 2    | Seedling     | BIL                | Na <sup>+</sup> uptake              | 4.26-5.43               | 4.59 cM       | 17.8    | „, <i>qNa2</i> (134.4 cM), <i>qNa10</i> (68.8cM) – This study                   | „       |
|                        |      | Seedling     |                    | Na <sup>+</sup> uptake              |                         |               |         |                                                                                 |         |

| Gene/QTL name    | Chr. | Growth Stage | Mapping Population   | Evaluation index                  | Interval/peak                          | Position (cM) | PVE (%) | References                                                                                    | Remarks |
|------------------|------|--------------|----------------------|-----------------------------------|----------------------------------------|---------------|---------|-----------------------------------------------------------------------------------------------|---------|
| <i>qSIS2.3</i>   | 2    | Seedling     | IL                   | Salt injury score (SIS)           | RM211                                  | 3.0 cM        | 6.5     | „                                                                                             | „       |
| <i>qSHL2.3</i>   | 2    | Seedling     | IL                   | Shoot length                      | RM211                                  | 3.0 cM        | 6.6     | „, <i>qSL1</i> (156 cM), <i>qSL8</i> (22 cM) – This study                                     | Absent  |
| <i>qST3</i>      | 3    | Seedling     | RIL                  |                                   | RG179 - RZ596                          | 138 cM        | 9.2     | Lee et al. 2006                                                                               | Novel   |
| <i>qSES3.1</i>   | 3    | Seedling     | F <sub>2:3</sub>     | SES                               | RM5626-R3M53                           | 111.0 cM      | 23.0    | Rahman et al. 2019 <i>qSES1</i> (151.8 cM) – This study „, <i>qSUR11</i> (21 cM) – This study | Novel   |
| <i>qSur3.2</i>   | 3    | Seedling     | F <sub>2:3</sub>     | Survival                          | RM5626-R3M53                           | 111.0         | 18.0    |                                                                                               | Novel   |
| Q <sub>NaK</sub> | 4    | Seedling     | RIL                  | Na:K discrimination               |                                        |               |         | Flowers et al. 2000 <i>qNaKR12</i> (39.4 cM) – This study                                     |         |
| Trait-based QTL  | 4    | Seedling     | RIL                  | K <sup>+</sup> uptake             | E12M65-1                               | 10 cM         | 6.8     | Koyama et al. 2001 <i>qK1</i> (156.5 cM) – This study                                         | Novel   |
| Trait-based QTL  | 4    | Seedling     | RIL                  | K <sup>+</sup> concentration      | E15M53-2                               | 90 cM         | 8.8     | „, <i>qK1</i> (156.5 cM) – This study                                                         | „       |
|                  | 4    | Seedling     | RIL                  | Na <sup>+</sup> concentration     | E12M73-1; E12M75-5; E15M50-5; E12M79-1 | 24 cM         | 6.7     | „, <i>qNa2</i> (134.4 cM), <i>qNa10</i> (68.8cM) – This study                                 | „       |
| Trait-based QTL  | 4    | Seedling     | RIL                  | Na:K ratio                        | E12M65-1                               | 14 cM         | 9.6     | „, <i>qNaKR12</i> (39.4 cM) – This study                                                      | „       |
| <i>qRKC-4</i>    | 4    | Seedling     | F <sub>2:3</sub>     | Root K <sup>+</sup> concentration | C891 - C513                            | -             | 21.6    | Lin et al. 2004                                                                               | „       |
| qSDM-5           | 5    | Seedling     | Double haploid lines | Seedling dry matter               | RZ70-RZ225                             | -             | 17.9    | Prasad et al. 2000 <i>qSDW1</i> (123.4 cM), <i>qSDW10</i> (68.6) – This study                 | „       |
| <i>qSHL-5</i>    | 5    | Seedling     | F <sub>2:4</sub>     | Shoot length                      | RM13-RM164                             | 106.8 cM      | 19.5    | Ghomi et al. 2013 <i>qSL1</i> (156 cM), <i>qSL8</i> (22 cM) – This study                      | Absent  |
| <i>qSHL5.04</i>  | 5    | Seedling     | IL                   | Shoot length                      | RM17749                                | 0.4 cM        | 8.5     | De Leon et al. 2017                                                                           | „       |
| Q <sub>K1</sub>  | 6    | Seedling     | NIL                  | K <sup>+</sup> uptake             |                                        |               |         | Flowers et al. 2000                                                                           | „       |

| Gene/QTL name   | Chr. | Growth Stage | Mapping Population   | Evaluation index                     | Interval/peak         | Position (cM) | PVE (%) | References                                                                  | Remarks |
|-----------------|------|--------------|----------------------|--------------------------------------|-----------------------|---------------|---------|-----------------------------------------------------------------------------|---------|
| qSGEM-6         | 6    | Germination  | Double haploid lines | Seed germination                     | RZ398-RG213 -         |               | 16.3    | <i>qK1</i> (156.5 cM) – This study<br>Prasad et al. 2000                    | „       |
| Trait-based QTL | 6    | Seedling     | RIL                  | Dry mass                             | E12M55-2              | 34 cM         | 9.7     | Koyama et al. 2001                                                          | Novel   |
| Trait-based QTL | 6    | Seedling     | RIL                  | K <sup>+</sup> uptake                | OSR19;<br>E12M80-2    | 30 cM         | 7.6     | „                                                                           | Absent  |
| Trait-based QTL | 6    | Seedling     | RIL                  | Na <sup>+</sup> concentration        | E12M35-2              | 106 cM        | 6.4     | „ <i>qNa2</i> (134.4 cM), <i>qNa10</i> (68.8cM) – This study                | „       |
| <i>qSDS-6</i>   | 6    | Seedling     | F <sub>2:3</sub>     | Seedling survival                    | C214 - R2549 -        |               | 17.0    | Lin et al. 2004 <i>qSUR11</i> (21 cM) – This study                          | Novel   |
| <i>qSES6</i>    | 6    | Seedling     | F2                   | SES                                  | RM586-<br>RM253       | -             | 39.7    | Bimpong et al. 2014 <i>qSES1</i> (151.8 cM) – This study                    | „       |
| <i>qSHL-6</i>   | 6    | Seedling     | F2:4                 | Shoot length                         | RM402-<br>RM549       | 87.4 cM       | 14.6    | Ghomi et al. 2013 <i>qSL1</i> (156 cM), <i>qSL8</i> (22 cM) – This study    | „       |
| <i>qSL6.1</i>   | 6    | Seedling     | RIL                  | Shoot length                         | fd13-id6004343        | 18.5 cM       | 12.1    | Bizimana et al. 2017 <i>qSL1</i> (156 cM), <i>qSL8</i> (22 cM) – This study | Novel   |
| <i>qSIS6.5</i>  | 6    | Seedling     | IL                   | Salt injury score (SIS)              | RM253                 | 5.4 cM        | 7.0     | De Leon et al. 2017                                                         | „       |
| <i>qSHL6.5</i>  | 6    | Seedling     | IL                   | Shoot length                         | RM253                 | 5.4 cM        | 12.6    | „                                                                           | Absent  |
| <i>qSDS-7</i>   | 7    | Seedling     | F <sub>2:3</sub>     | Seedling survival                    | R2401 -<br>L538T7     | -             | 13.9    | Lin et al. 2004 <i>qSUR11</i> (21 cM) – This study                          | „       |
| <i>qSNC-7</i>   | 7    | Seedling     | F <sub>2:3</sub>     | Shoot Na <sup>+</sup> concentration  | C1057 -<br>R2401      | -             | 48.5    | „                                                                           | Absent  |
| <i>qSNTQ-7</i>  | 7    | Seedling     | F <sub>2:3</sub>     | Shoot Na <sup>+</sup> total quantity | C1057 -<br>R2401      | -             | 16.1    | „                                                                           | „       |
| <i>qRKC-7</i>   | 7    | Seedling     | F <sub>2:3</sub>     | Root K <sup>+</sup> concentration    | C1057 -<br>R2401      | -             | 17.8    | „                                                                           | Absent  |
| <i>qRKTQ-7</i>  | 7    | Seedling     | F <sub>2:3</sub>     | Root K <sup>+</sup> total quantity   | C1057 -<br>R2401      | -             | 17.3    | „                                                                           | „       |
| <i>qSL7</i>     | 7    | Seedling     | RIL                  | Higher shoot length                  | SNP7-191-<br>SNP7-226 | 86.31 cM      | 9.9     | Jahan et al. 2020                                                           | „       |

| Gene/QTL name         | Chr. | Growth Stage | Mapping Population | Evaluation index                   | Interval/peak          | Position (cM) | PVE (%) | References                                                                  | Remarks |
|-----------------------|------|--------------|--------------------|------------------------------------|------------------------|---------------|---------|-----------------------------------------------------------------------------|---------|
| <i>qSIS7.12</i>       | 7    | Seedling     | IL                 | Salt injury score (SIS)            | RM214                  | 12.8 cM       | 5.9     | De Leon et al. 2017                                                         | „       |
| <i>qSIS7.17</i>       | 7    | Seedling     | IL                 | Salt injury score (SIS)            | RM5793                 | 17.5 cM       | 8.1     | „                                                                           | „       |
| <i>qSHL7.12</i>       | 7    | Seedling     | IL                 | Shoot length                       | RM214                  | 12.8 cM       | 6.7     | „ <i>qSL1</i> (156 cM), <i>qSL8</i> (22 cM) – This study                    | „       |
| <i>Q<sub>K2</sub></i> | 9    | Seedling     | NIL                | K <sup>+</sup> uptake              |                        |               |         | Flowers et al. 2000 <i>qK1</i> (156.5 cM) – This study                      | Absent  |
| Trait-based QTL       | 9    | Seedling     | RIL                | K <sup>+</sup> uptake              | E12M55-4               | 96 cM         | 19.6    | Koyama et al. 2001 <i>qK1</i> (156.5 cM) – This study                       | „       |
| <i>qRNC-9</i>         | 9    | Seedling     | F <sub>2:3</sub>   | Root Na <sup>+</sup> concentration | R1751 - R2638          | -             | 16.7    | Lin et al. 2004                                                             | „       |
| <i>qSHL-9</i>         | 9    | Seedling     | F <sub>2:4</sub>   | Shoot length                       | E37-M60-13- E36-M60-1  | 136.1 cM      | 9.9     | Ghomi et al. 2013                                                           | „       |
| <i>qSES10</i>         | 10   | Seedling     | F <sub>2</sub>     | SES                                | RM228- RM333           | -             | 30.7    | Bimpong et al. 2014 <i>qSES1</i> (151.8 cM) – This study                    | Absent  |
| <i>qSHL-10</i>        | 10   | Seedling     | F <sub>2:4</sub>   | Shoot length                       | RM2863-E36-M61-13      | 111.4 cM      | 4.1     | Ghomi et al. 2013 <i>qSL1</i> (156 cM), <i>qSL8</i> (22 cM) – This study    | „       |
| <i>qSPAD10.1</i>      | 10   | Seedling     | F <sub>2</sub>     | SPAD value                         | RM501C- RM5806         | 33.2 cM       | 15      | Rahman et al. 2019 <i>qSPAD7</i> (91.4 cM) – This study                     | Novel   |
| <i>qSES11</i>         | 11   | Seedling     | F <sub>2</sub>     | SES                                | RM536- RM287           | -             | 37.2    | Bimpong et al. 2014 <i>qSES1</i> (151.8 cM) – This study                    | „       |
| <i>qTS11.1</i>        | 11   | Reproductive | F <sub>2</sub>     | Total spikelet number              | Id11000858             | 14.0 cM       | 15.8    | Mondal et al. 2019 Nakhla et al. 2021 <i>qK1</i> (156.5 cM) – This study    | „       |
| <i>qK11</i>           | 11   | Seedling     | BIL                | K <sup>+</sup> uptake              | 25.75-2.59             | .43 cM        | 9.6     |                                                                             | „       |
| <i>qSL12.1</i>        | 12   | Seedling     | RIL                | Shoot length                       | id12000252- id12001321 | 6.9 cM        | 9.8     | Bizimana et al. 2017 <i>qSL1</i> (156 cM), <i>qSL8</i> (22 cM) – This study | Novel   |
| <i>qSES12.1</i>       | 12   | Seedling     | RIL                | SES                                | id12000252- id12001321 | 6.9 cM        | 10.6    | O'Connor et al. 2020 <i>qSES1</i> (151.8 cM) – This study                   | „       |
| <i>qDEG-S-2-2</i>     |      | Reproductive | Backcross          | Spikelet degeneration              |                        | 6.8 cM        | 34.44   | „                                                                           | „       |
| <i>qDEG-S-4-3</i>     |      |              | Backcross          |                                    |                        | 4.19 cM       | 17.43   | Rahman et al. 2019 <i>qSUR11</i> (21 cM) – This study                       | „       |
| <i>qSur12.3</i>       | 12   |              | F <sub>2:3</sub>   |                                    |                        | 67.1 cM       | 16.0    |                                                                             | Novel   |

| Gene/QTL name | Chr. | Growth Stage          | Mapping Population | Evaluation index               | Interval/peak  | Position (cM) | PVE (%) | References | Remarks |
|---------------|------|-----------------------|--------------------|--------------------------------|----------------|---------------|---------|------------|---------|
|               |      | Reproductive Seedling |                    | Spikelet degeneration Survival | S12055-RM28466 |               |         |            |         |

Chr: Chromosome number; IL: Introgression line; PVE: Phenotypic variation explained; RIL: Recombinant inbred line; BIL: Backcross Introgression line; SES: Overall phenotypic performance; SL: Shoot length; Na: Na<sup>+</sup> concentration; K: K<sup>+</sup> concentration; NaK-R: Na-K ratio, Sur: Survival; indicates embedded QTLs identified in this study
